# Supplementary material
Source: PubMed Central journal article supplement (PMC3486292)
Supplement: JVI.01147-12_zjv999096722so1.pdf [file JVI.01147-12_zjv999096722so1.pdf]

Figure S1

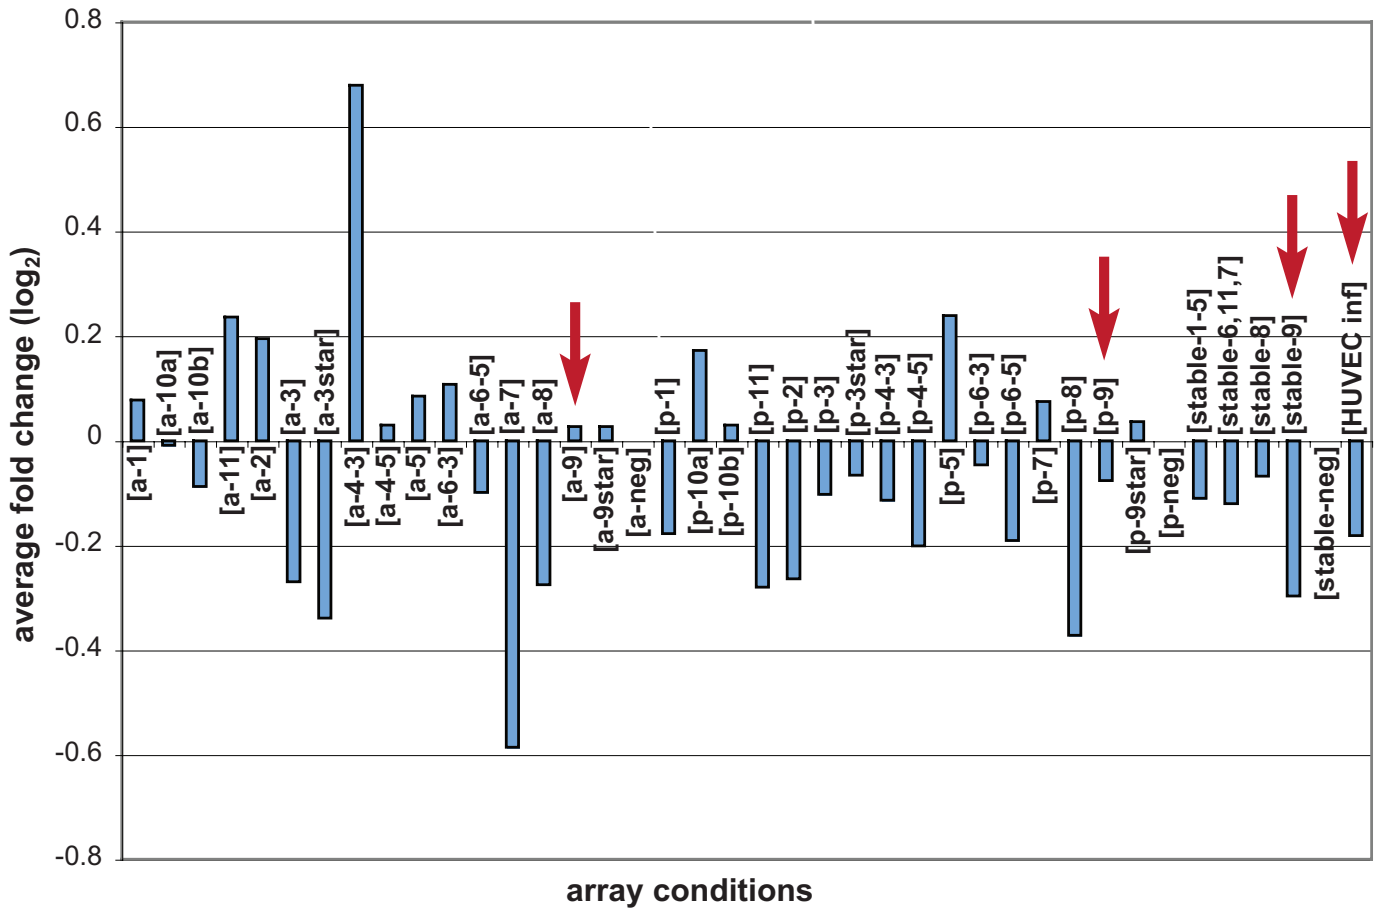

Figure S2

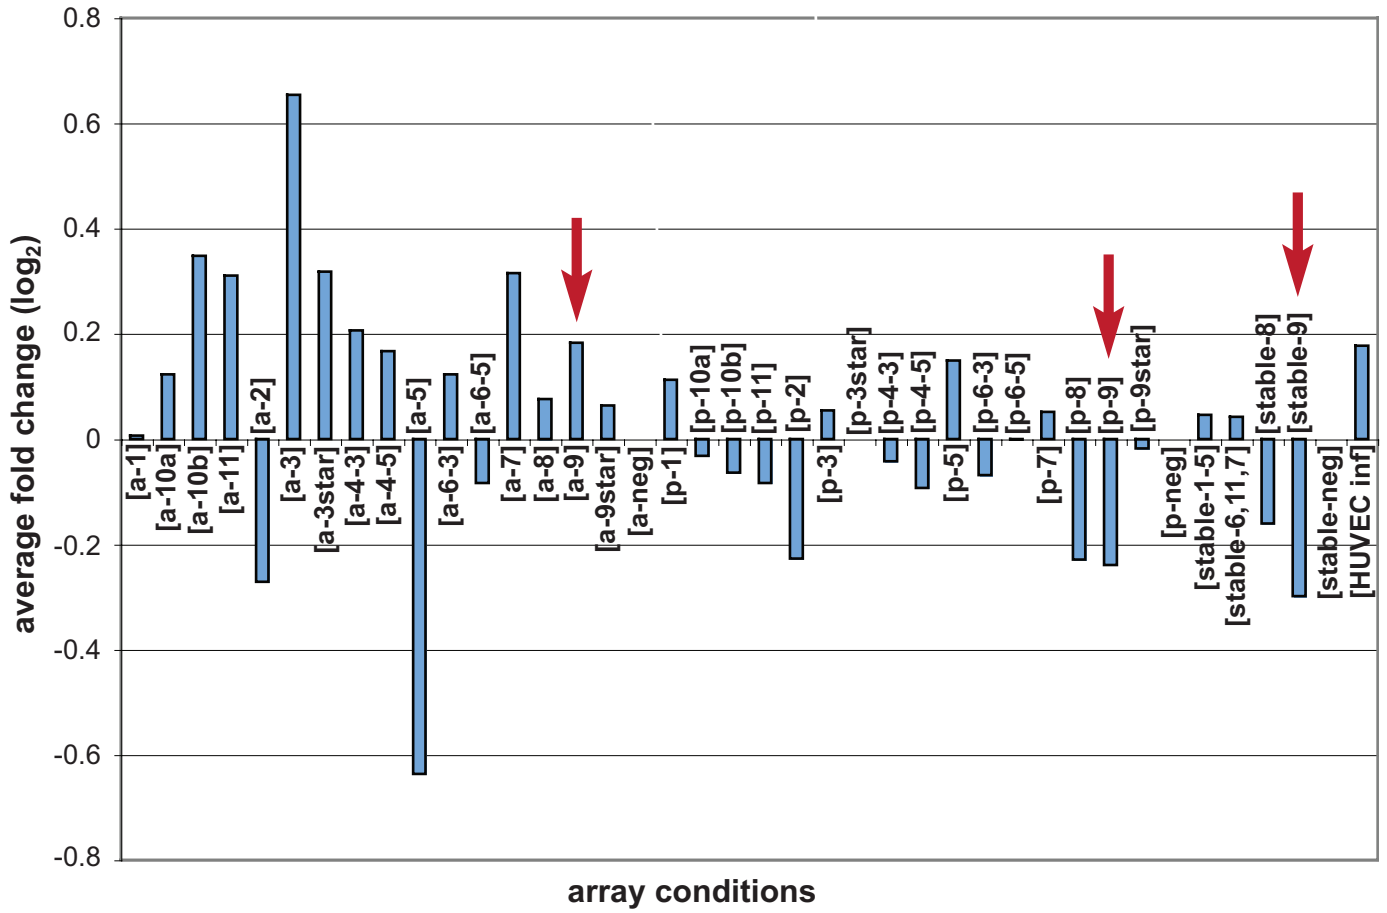

## SUPPLEMENTAL FIGURE LEGENDS AND SEQUENCES

**Figure S1. Microarray data suggests inhibition of IRAK1 by miRNAs.** Average fold change in IRAK1 expression in each of the cellular gene expression arrays, denoted as follows: a-X, latently infected B cells transfected with LNA inhibitors to KSHV miR-X; p-X, B cells transiently transfected with KSHV miR-X; stable-X, B cells stably transduced with KSHV miR-X. Arrows highlight the arrays using miR-K9.

**Figure S2. Microarray data suggests inhibition of MYD88 by miRNAs.** Average fold change in MYD88 expression in each of the cellular gene expression arrays, denoted as described in Figure S1.

Sequences:

IRAK1 3'UTR:

```
TGTGTTACCTGGGCAGATCCCCCAAATCCGGAAGTCAAAGTTCTCATGGTCA
GAAGTTCTCATGGTGCACGAGTCCTCAGCACTCTGCCGGCAGTGGGGGTGGG
GGCCCATGCCCGCGGGGGAGAGAAGGAGGTGGCCCTGCTGTTCTAGGCTCTG
TGGGCATAGGCAGGCAGAGTGGAACCCTGCCTCCATGCCAGCATCTGGGGGC
AAGGAAGGCTGGCATCATCCAGTGAGGAGGCTGGCGCATGTTGGGAGGCTGC
TGGCTGCACAGACCCGTGAGGGGAGGAGAGGGGCTGCTGTGCAGGGGTGTG
GAGTAGGGAGCTGGCTCCCCTGAGAGCCATGCAGGGCGTCTGCAGCCCAGGC
CTCTGGCAGCAGCTCTTTGCCCATCTCTTTGGACAGTGGCCACCCTGCACAAT
GGGGCCGACGAGGCCTAGGGCCCTCCTACCTGCTTACAATTTGGAAAAGTGT
GGCCGGGTGCGGTGGCTCACGCCTGTAATCCCAGCACTTTGGGAGGCCAAGG
CAGGAGGATCGCTGGAGCCCAGTAGGTCAAGACCAGCCAGGGCAACATGAT
GAGACCCTGTCTCTGCCAAAAAATTTTTTAAACTATTAGCCTGGCGTGGTAGC
```

GCACGCCTGTGGTCCCAGCTGCTGGGGAGGCTGAAGTAGGAGGATCATTAT  
GCTTGGGAGGTCGAGGCTGCAGTGAGTCATGATTGTATGACTGCACTCCAGC  
CTGGGTGACAGAGCAAGACCCTGTTTCAAAAAGAAAAACCCTGGGAAAAGT  
GAAGTATGGCTGTAAGTCTCATGGTTCAGTCCTAGCAAGAAGCGAGAATTCT  
GAGATCCTCCAGAAAGTCGAGCAGCACCCACCTCCAACCTCGGGCCAGTGTC  
TTCAGGCTTTACTGGGGACCTGCGAGCTGGCCTAATGTGGTGGCCTGCAAGC  
CAGGCCATCCCTGGGCGCCACAGACGAGCTCCGAGCCAGGTCAGGCTTCGGA  
GGCCACAAGCTCAGCCTCAGGCCCAGGCACTGATTGTGGCAGAGGGGCCACT  
ACCCAAGGTCTAGCTAGGCCCAAGACCTAGTTACCCAGACAGTGAGAAGCCC  
CTGGAAGGCAGAAAAGTTGGGAGCATGGCAGACAGGGAAGGGAAACATTTT  
CAGGGAAAAGACATGTATCACATGTCTTCAGAAGCAAGTCAGGTTTCATGTA  
ACCGAGTGTCTCTTGCGTGTCCAAAAGTAGCCCAGGGCTGTAGCACAGGCT  
TCACAGTGATTTTGTGTTTCAGCCGTGAGTCACACTACATGCCCCCGTGAAGCT  
GGGCATTGGTGACGTCCAGGTTGTCCTTGAGTAATAAAAACGTATGTTGC

MYD88 3'UTR:

CTTGGTTCTGGACTCGCCTTGCCAAGGCCTTGTCCCTGCCCTGAAGACTGTTC  
TGAGGCCCTGGGTGTGTGTGTATCTGTCTGCCTGTCCATGTACTTCTGCCCTG  
CCTCCTCCTTTCGTTGTAGGAGGAATCTGTGCTCTACTTACCTCTCAATTCCTG  
GAGATGCCAACTTCACAGACACGTCTGCAGCAGCTGGACATCACATTCATG  
TCCTGCATGGAACCAGTGGCTGTGAGTGGCATGTCCACTTGCTGGATTATCAG  
CCAGGACACTATAGAACAGGACCAGCTGAGACTAAGAAGGACCAGCAGAGC  
CAGCTCAGCTCTGAGCCATTCACACATCTTCACCCTCAGTTTCCTCACTTGAG

GAGTGGGATGGGGGAGAACAGAGAGTAGCTGTGTTTGAATCCCTGTAGGAAAT  
GGTGAAGCATAGCTCTGGGTCTCCTGGGGGAGACCAGGCTTGGCTGCGGGAG  
AGCTGGCTGTTGCTGGACTACATGCTGGCCACTGCTGTGACCACGACACTGCT  
GGGGCAGCTTCTTCCACAGTGATGCCTACTGATGCTTCAGTGCCTCTGCACAC  
CGCCCATTCCACTTCCTCCTTCCCCACAGGGCAGGTGGGGAAGCAGTTTGGCC  
CAGCCCAAGGAGACCCACCTTGAGCCTTATTTCTAATGGGTCCACCTCTCA  
TCTGCATCTTTCACACCTCCCAGCTTCTGCCAACCTTCAGCAGTGACAAGTC  
CCCAAGAGACTCGCCTGAGCAGCTTGGGCTGCTTTTCATTTCCACCTGTCAGG  
ATGCCTGTGGTCATGCTCTCAGCTCCACCTGGCATGAGAAGGGATCCTGGCCT  
CTGGCATATTCATCAAGTATGAGTTCTGGGGATGAGTCACTGTAATGATGTGA  
GCAGGGAGCCTTCTCCTGGGCCACCTGCAGAGAGCTTTCACCAACTTTG  
TACCTTGATTGCCTTACAAAGTTATTTGTTTACAAACAGCGACCATATAAAAG  
CCTCCTGCCCCAAAGCTTGTGGGCACATGGGCACATACAGACTCACATACAG  
ACACACACATATATGTACAGACATGTA CTCTCACACACACAGGCACCAGCAT  
ACACACGTTTTTCTAGGTACAGCTCCCAGGAACAGCTAGGTGGGAAAGTCCC  
ATCACTGAGGGAGCCTAACCATGTCCCTGAACAAAAATTGGGCACTCATCTA  
TTCCTTTTCTCTTGTGTCCCTACTCATTGAAACCAA ACTCTGGAAAGGACCCA  
ATGTACCAGTATTTATACCTCTAATGAAGCACAGAGAGAGGAAGAGAGCTGC  
TTAAACTCACACAACAATGAACTGCAGACACAGCTGTTCTCTCCCTCTCTCCT  
TCCCAGAGCAATTTATACTTTACCCTCAGGCTGTCTCTGGGGAGAAGGTGCC  
ATGGTCTTAGGTGTCTGTGCCCCAGGACAGACCCTAGGACCCTAAATCCAAT  
AGAAAATGCATATCTTTGCTCCACTTTCAGCCAGGCTGGAGCAAGGTACCTTT  
TCTTAGGATCTTGGGAGGGAATGGATGCCCTCTCTGCATGATCTTGTTGAGG

CATTTAGCTGCCATGCACCTGTCCCCCTTTAATACTGGGCATTTTAAAGCCAT  
CTCAAGAGGCATCTTCTACATGTTTTGTACGCATTAAAATAATTTCAAAGATA  
TCTGAGAAAAGCCGATATTTGCCATTCTTCCTATATCCTGGAATATATCTTGC  
ATCCTGAGTTTATAATAATAAATAATATTCTACCTTGAAACTTGTGTGTGTG  
TTGAGTGG

KSHV miRNAs from Ambion

>12-1

AUUACAGGAAACUGGGUGUAAGC

>12-10a

UAGUGUUGUCCCCCGAGUGGC

>12-10b

UGGUGUUGUCCCCCGAGUGGC

>12-11

UUA AUGCUUAGCCUGUGUCCGA

>12-2

AACUGUAGUCCGGUCGAUCUG

>12-3

UCACAUUCUGAGGACGGCAGCG

>12-3\*

UCGCGGUCACAGAAUGUGACA

>12-4-3p

UAGAAUACUGAGGCCUAGCUGA

>12-4-5p

AGCUAAACCGCAGUACUCUAGG

>12-5

UAGGAUGCCUGGAACUUGCCGG

>12-6-5p

CCAGCAGCACCUGAAUCCAUCGG

>12-6-3

UGAUGGUUUUCGGGCUGUUGAG

>12-7

UGAUCCCAUGUUGCUGGCGCU

>12-8

UAGGCGCGACUGAGAGAGCACG

>12-9\*

ACCCAGCUGCGUAAACCCCGCU

>12-9

CUGGGUUAUACGCAGCUGCGUAA
